# Supplementary material
Source: Springer Nature journal article supplement (https://www.springermedizin.de/resource/supplementary/12905_2013_398_MOESM1_ESM.docx/9518682)
Supplement: MOESM1 [file 9518682]

Figure 1: Knowledge about osteoporosis (n = 427)
